# Supplementary material for: The feasibility of low-intensity psychological therapy for depression co-occurring with autism in adults: The Autism Depression Trial (ADEPT) – a pilot randomised controlled trial
Source: PubMed Central journal article supplement — Autism. 2019 Nov 29;24(6):1360–72. doi: 10.1177/1362361319889272 (PMC8645299; doi:10.1177/1362361319889272), 2019-11-29
Supplement: AUT889272_Supplemental_material_2.pdf [file AUT889272_Supplemental_material_2.pdf]

**Health care resource use: mental health medication use, other NHS primary and secondary care and other mental health services**

| <b>Outcome (at least once during study)</b>                         | Self-reported data from questionnaires |
|---------------------------------------------------------------------|----------------------------------------|
|                                                                     | N=70                                   |
| Use of other medication for mental health (MH)                      | 29% (n=20, 4% missing)                 |
| At least one overnight stay in NHS hospital due to MH problems      | 0% (n=0, 20% missing)                  |
| At least one visit to A&E department due to MH problems             | 1% (n=1, 20% missing)                  |
| At least one visit to out-of-hours clinic                           | 5% (n=4, 24% missing)                  |
| At least one visit to NHS walk-in centre                            | 10% (n=7, 20% missing)                 |
| At least one visit to private hospital or clinic due to MH problems | 0% (n=0, 20% missing)                  |
| Use of counselling or talking therapy                               | 23% (n=16, 21% missing)                |
| Use of online CBT                                                   | 1% (n=1, 43% missing)                  |
| Use of other services for MH problems                               | 14% (n=10, 20% missing)                |
| Help for MH problems from home help/home care worker                | 9% (n=6, 20% missing)                  |
| Help for MH problems from day centre/drop-in                        | 7% (n=5, 20% missing)                  |
| Help for MH problems from social group                              | 14% (n=10, 20% missing)                |
| Help for MH problems from self-help group                           | 10% (n=7, 20% missing)                 |
| Help for MH problems from voluntary organisation                    | 14% (n=10, 20% missing)                |
| Help for MH problems from another source                            | 10% (n=7, 21% missing)                 |
| Help with childcare due to MH problems                              | 4% (n=3, 20% missing)                  |
| Help in and around the house due to MH problems                     | 31% (n=22, 20% missing)                |

|                                                                               |                         |
|-------------------------------------------------------------------------------|-------------------------|
| Help outside the house due to MH problems                                     | 23% (n=16, 20% missing) |
| Other additional help due to MH problems                                      | 13% (n=9, 20% missing)  |
| Purchase over-the-counter treatments                                          | 7% (n=5, 20% missing)   |
| Time off work                                                                 | 27% (n=19, 20% missing) |
| Anyone else time of work to care due to MH problems                           | 7% (n=5, 20% missing)   |
| Attend autism social group                                                    | 24% (n=17, 20% missing) |
| Attend autism drop-in or advice service                                       | 26% (n=18, 20% missing) |
| Attend autism carers support group                                            | 6% (n=4, 20% missing)   |
| Allocated social worker                                                       | 13% (n=9, 20% missing)  |
| Receive support to attend work                                                | 7% (n=5, 20% missing)   |
| Attend other service for autism                                               | 14% (n=10, 20% missing) |
| Use of complementary or alternative therapy for any medical condition         | 3% (n=2, 20% missing)   |
| Use of exercise activity scheme for any medical condition                     | 0% (n=0, 20% missing)   |
| Use of NHS direct for any medical condition                                   | 6% (n=4, 20% missing)   |
| Use of community-based health service professionals for any medical condition | 11% (n=8, 20% missing)  |
| Home visit from community support worker for any medical condition            | 10% (n=7, 20% missing)  |
| Home visit from mental health nurse for any medical condition                 | 3% (n=2, 20% missing)   |
| Home visit from occupational therapist for any medical condition              | 0% (n=0, 20% missing)   |
| Home visit from social worker                                                 | 6% (n=4, 20% missing)   |

|                                                              |                         |
|--------------------------------------------------------------|-------------------------|
| Home visit from other professional for any medical condition | 7% (n=5, 20% missing)   |
| Victim of crime                                              | 6% (n=4, 20% missing)   |
| Suspect in criminal investigation                            | 0% (n=0, 20% missing)   |
| Appeared in court as witness                                 | 0% (n=0, 20% missing)   |
| Appeared in court as suspect                                 | 0% (n=0, 21% missing)   |
| Meet probation officer                                       | 1% (n=1, 20% missing)   |
| Custody                                                      | 0% (n=0, 21% missing)   |
| Pay NHS prescription charges                                 | 30% (n=21, 20% missing) |
| Receive disability payments                                  | 43% (n=30, 20% missing) |
| Receive Carer's allowance for patient                        | 6% (n=4, 20% missing)   |

Data reported over whole trial period. Outcome recorded as completed if reported in at least one self-reported questionnaire and only recorded missing if missing in every questionnaire.
