# Supplementary material for: The feasibility of low-intensity psychological therapy for depression co-occurring with autism in adults: The Autism Depression Trial (ADEPT) – a pilot randomised controlled trial
Source: PubMed Central journal article supplement — Autism. 2019 Nov 29;24(6):1360–72. doi: 10.1177/1362361319889272 (PMC8645299; doi:10.1177/1362361319889272), 2019-11-29
Supplement: AUT889272_Supplemental_material_3.pdf [file AUT889272_Supplemental_material_3.pdf]

**Health care resource use: anti-depressant use/prescription, NHS outpatient or community mental health team clinics for mental health problems and primary care consultations (Bristol centre only)**

| <b>Outcome</b>                                                                    | Self-reported data from questionnaires<br>N=35 | Electronic medical records<br>N=35 | Concordance between sources<br>N=35 |
|-----------------------------------------------------------------------------------|------------------------------------------------|------------------------------------|-------------------------------------|
| Anti-depressant medication taken/prescribed                                       | 66% (n=23, 0% missing)                         | 43% (n=15, 14% missing)            | 69% (n=24, 0% missing both sources) |
| Number of different anti-depressant taken/prescribed                              |                                                |                                    |                                     |
| 1                                                                                 | 74% (17/23)                                    | 93% (14/15)                        | 50% (12/24)                         |
| 2                                                                                 | 13% (3/23)                                     | 7% (1/15)                          | 0                                   |
| 3                                                                                 | 13% (3/23)                                     | 0                                  | 0                                   |
| NHS outpatient or community mental health team clinics for mental health problems | 11% (n=4, 9% missing)                          | 49% (n=17, 11% missing)            | 46% (n=16, 0% missing both sources) |
| Number of visits                                                                  |                                                |                                    |                                     |
| 1                                                                                 | 0                                              | 18% (3/17)                         |                                     |
| 2                                                                                 | 50% (2/4)                                      | 0                                  |                                     |
| 3                                                                                 | 0                                              | 29% (5/17)                         |                                     |
| 4                                                                                 | 25% (1/4)                                      | 0                                  |                                     |
| 7                                                                                 | 0                                              | 6% (1/17)                          |                                     |
| 8                                                                                 | 0                                              | 6% (1/17)                          |                                     |

|                                                             |                        |                        |                                     |
|-------------------------------------------------------------|------------------------|------------------------|-------------------------------------|
| 11                                                          | 0                      | 6% (1/17)              |                                     |
| 12                                                          | 0                      | 6% (1/17)              |                                     |
| 17                                                          | 0                      | 6% (1/17)              |                                     |
| 23                                                          | 0                      | 6% (1/17)              |                                     |
| 24                                                          | 0                      | 6% (1/17)              |                                     |
| 27                                                          | 0                      | 6% (1/17)              |                                     |
| 31                                                          | 0                      | 6% (1/17)              |                                     |
| Missing                                                     | 25% (1/4)              | 0                      |                                     |
| At least one GP visit at practice for any medical condition | 46% (n=16, 9% missing) | 26% (n=9, 14% missing) | 37% (n=13, 3% missing both sources) |
| Number of visits                                            |                        |                        |                                     |
| 0                                                           | 46% (16/35)            | 60% (21/35)            | 31% (11/35)                         |
| 1                                                           | 14% (5/35)             | 9% (3/35)              | 3% (1/35)                           |
| 2                                                           | 11% (4/35)             | 6% (2/35)              | 0                                   |
| 3                                                           | 6% (2/35)              | 0                      | 0                                   |
| 4                                                           | 3% (1/35)              | 3% (1/35)              | 0                                   |
| 5                                                           | 3% (1/35)              | 9% (3/35)              | 3% (1/35)                           |
| 6                                                           | 3% (1/35)              | 0                      | 0                                   |
| 7                                                           | 3% (1/35)              | 0                      | 0                                   |
| 9                                                           | 3% (1/35)              | 0                      | 0                                   |
| Missing                                                     | 9% (3/35)              | 14% (5/35)             | 3% (1/35)                           |

|                                                      |                      |                       |                                     |
|------------------------------------------------------|----------------------|-----------------------|-------------------------------------|
| At least one GP home visit for any medical condition | 3% (n=1, 9% missing) | 0% (n=0, 14% missing) | 77% (n=27, 3% missing both sources) |
| Number of visits                                     |                      |                       |                                     |
| 0                                                    | 89% (31/35)          | 86% (30/35)           | 60% (42/35)                         |
| 1                                                    | 3% (1/35)            | 0                     |                                     |
| Missing                                              | 9% (3/70)            | 14% (5/35)            | 3% (1/35)                           |
