# Supplementary figures and images for: The feasibility of low-intensity psychological therapy for depression co-occurring with autism in adults: The Autism Depression Trial (ADEPT) – a pilot randomised controlled trial
Source: PubMed Central journal article supplement — Autism. 2019 Nov 29;24(6):1360–72. doi: 10.1177/1362361319889272 (PMC8645299; doi:10.1177/1362361319889272), 2019-11-29

# Web Appendix 1

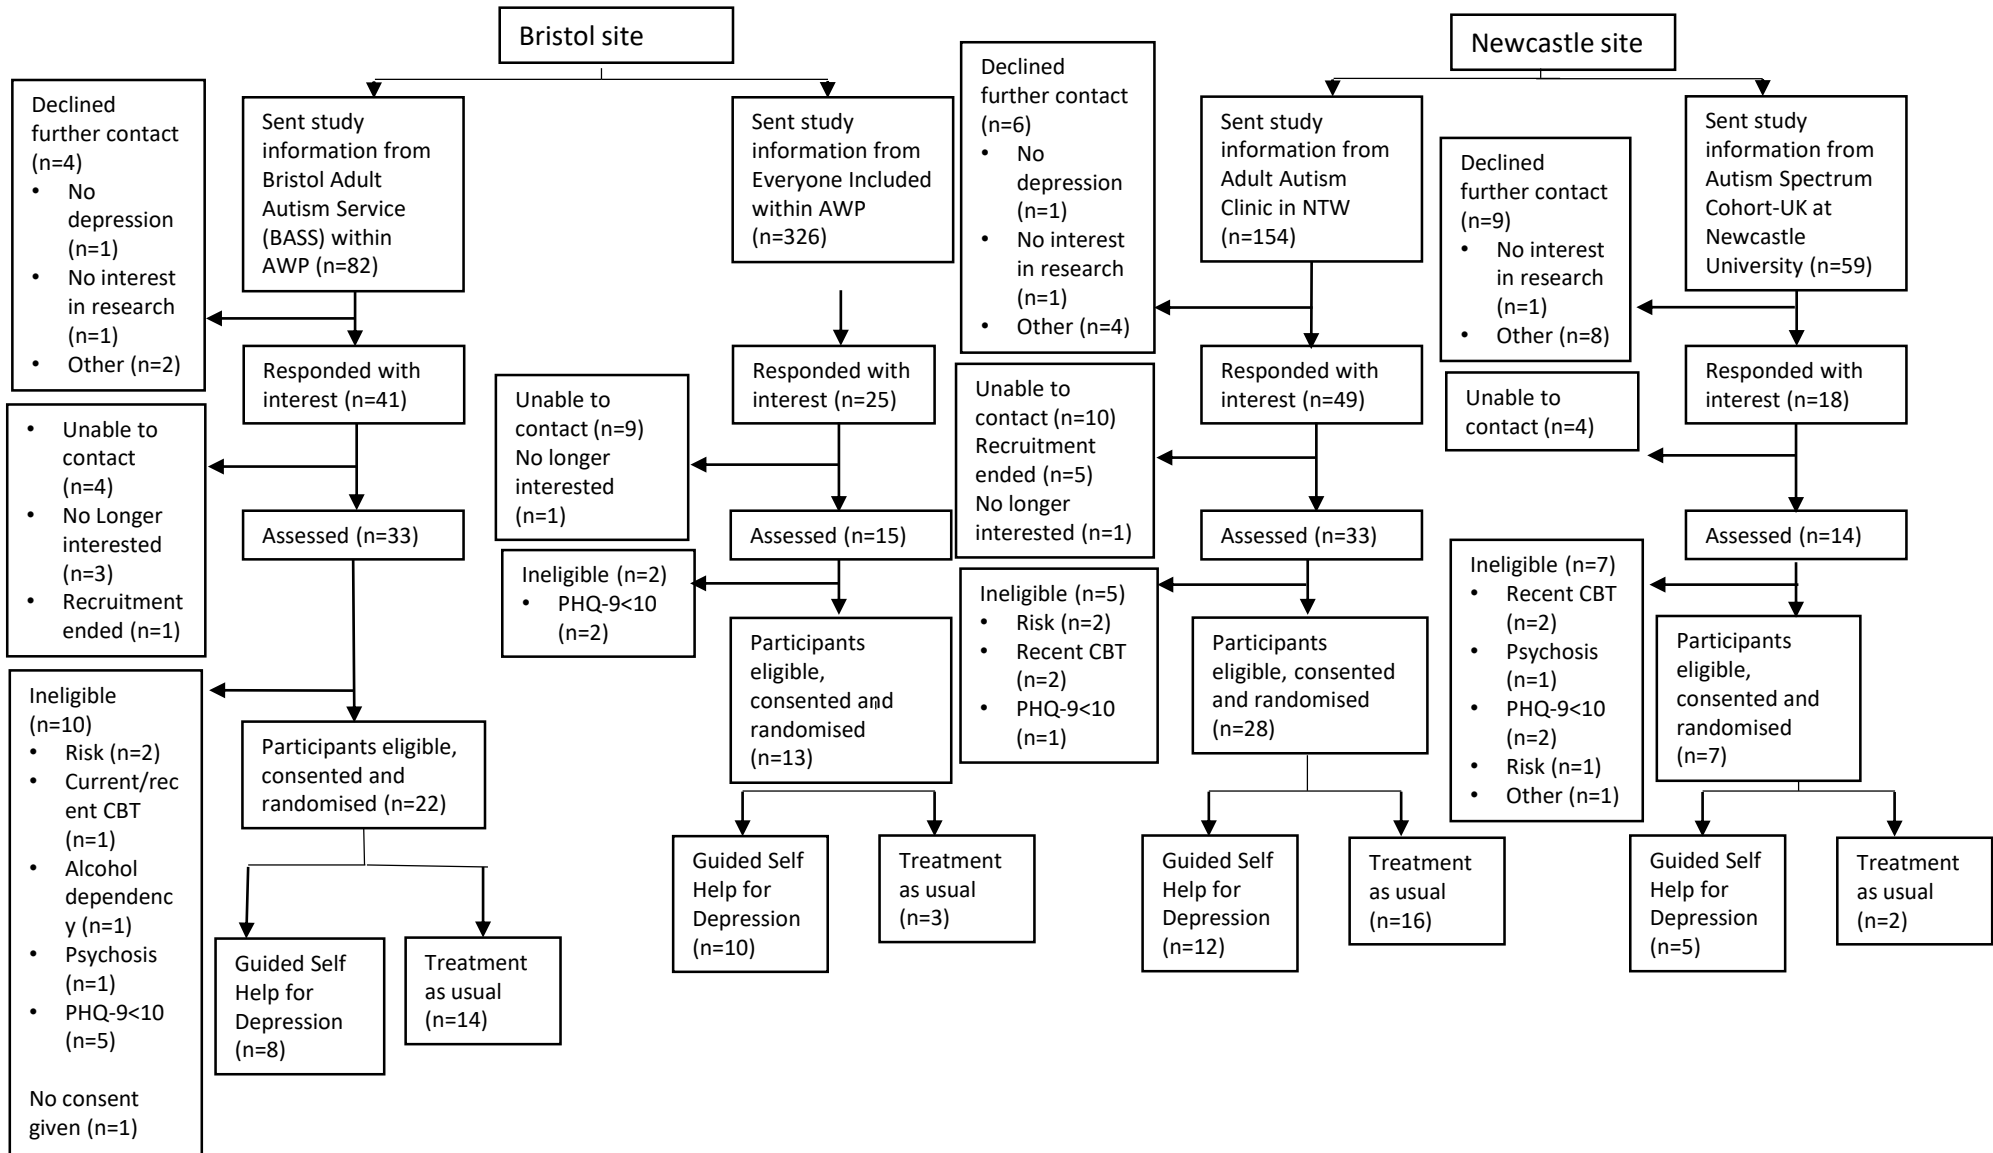

Supplement: AUT889272_Supplemental_material_1.pdf [file AUT889272_Supplemental_material_1.pdf]
